# Supplementary material for: Long noncoding RNA SPRY4-IT1 regulates intestinal epithelial barrier function by modulating the expression levels of tight junction proteins
Source: PubMed Central journal article supplement — Mol Biol Cell. 2016 Feb 15;27(4):617–26. doi: 10.1091/mbc.E15-10-0703 (PMC4750922; doi:10.1091/mbc.e15-10-0703), 2016-02-15
Supplement: supp_E15-10-0703v1_CombinedSupMats.pdf [file supp_E15-10-0703v1_CombinedSupMats.pdf]

# Supplemental Materials

*Molecular Biology of the Cell*

Xiao et al.

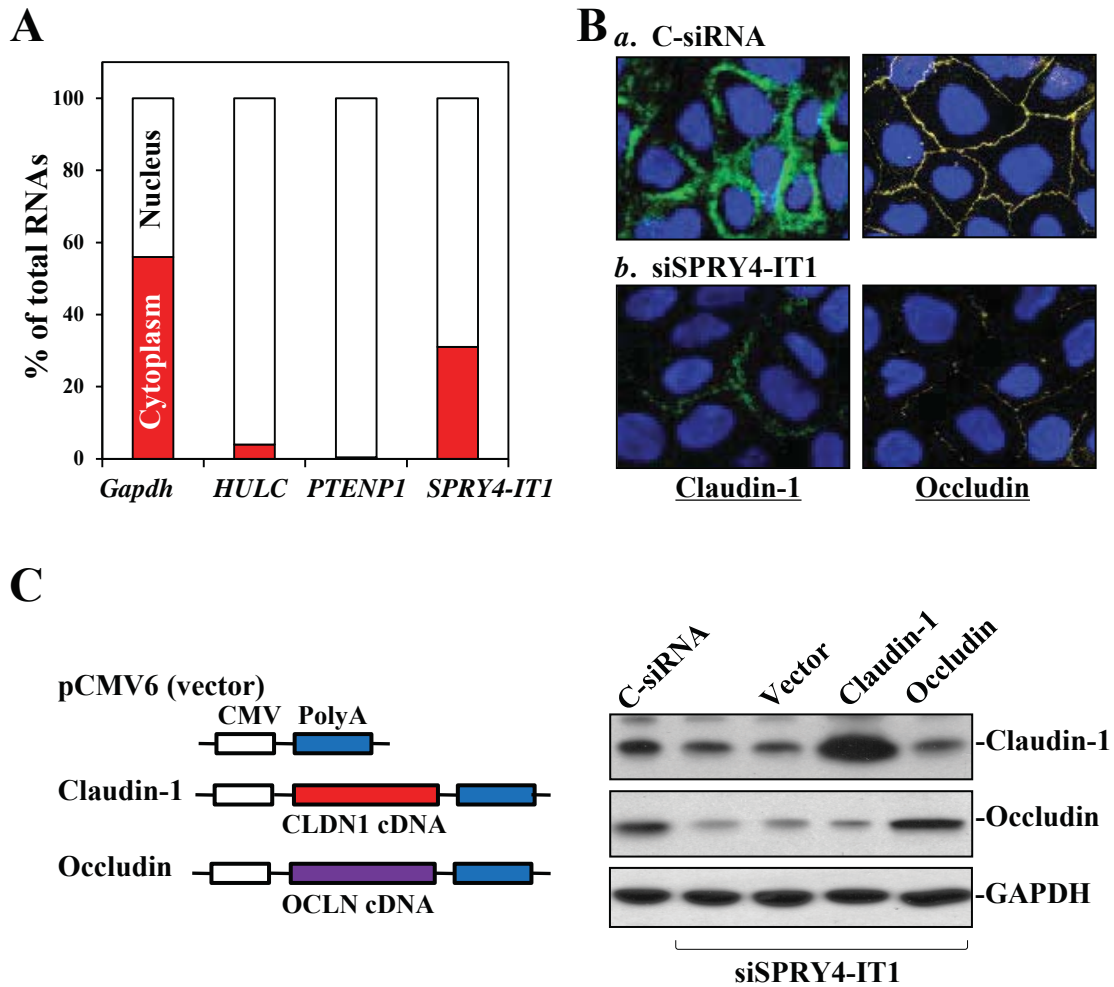

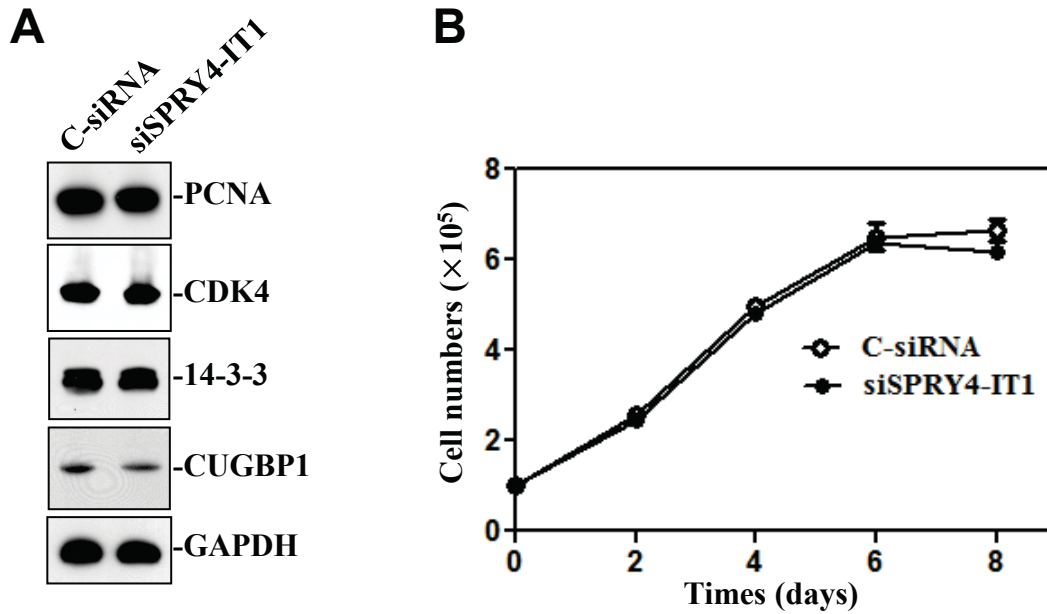

**Supplementary Figure 2. Effect of SPRY4-IT1 silencing on Caco-2 cell proliferation.** A) Representative immunoblots of PCNA (proliferating cell nuclear antigen), CDK4 (cyclin-dependent kinase 4), 14-3-3, and CUGBP1 (CUG-binding protein-1) proteins in Caco-2 cells 48 h after transfection with siSPRY4-IT1 or C-siRNA. B) Cell numbers at different times after transfected with siSPRY4-IT1 or C-siRNA. Values are the means  $\pm$  SEM ( $n = 6$ ).

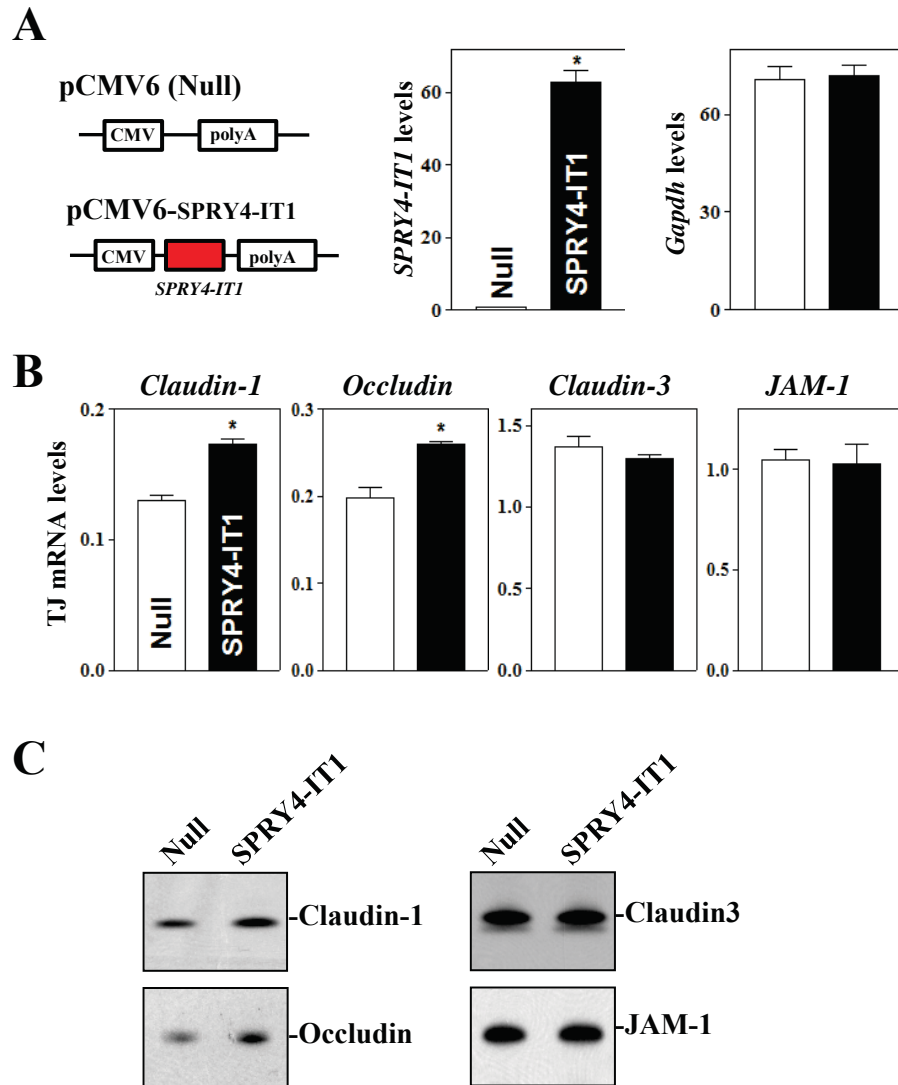

**Supplementary Figure 3. Ectopic overexpression of SPRY4-IT1 on TJ expression in Caco-2 cells.** **A)** *SPRY4-IT1* levels 48 h after transfecting cells with the *SPRY4-IT1* expression or control (null) vector. Values are means  $\pm$  SEM from three separate experiments. \* $P < 0.05$  compared with Null. **B)** Changes in the levels of TJ mRNAs in cells described in **A**. **C)** Representative immunoblots of TJ proteins in cells described in **A**.

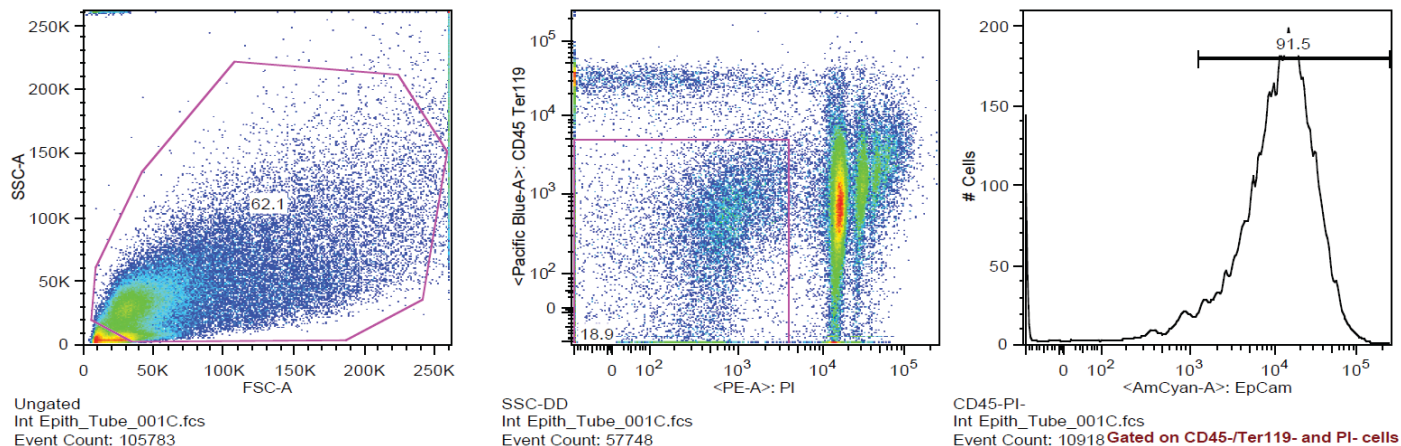

**Supplementary Figure 4. Population of IECs in the extracted tissue as measured by fluorescence-activated cell sorting analysis.** The small intestinal mucosa was scraped from the underlying smooth muscles using a glass microscope slide and incubated in stain buffer (BD biosciences) containing FBS and 0.5 mM EDTA for 15 min at 37°C. Cells were filtered with a 70- $\mu$ m cell strainer (BD biosciences) and blocked with Fc Block (2.4G2) for 5 min at room temperature, followed by incubated with antibodies and other reagents for 30 min 4°C. Dead cells were identified and excluded after staining with propidium iodide (PI). The epithelial cell fraction was defined by PI-CD45-TER119-EpCAM<sup>+</sup> gating. Samples were analyzed by using a BD LSR II Flow Cytometer System. Experiments were repeated six times and showed similar results.

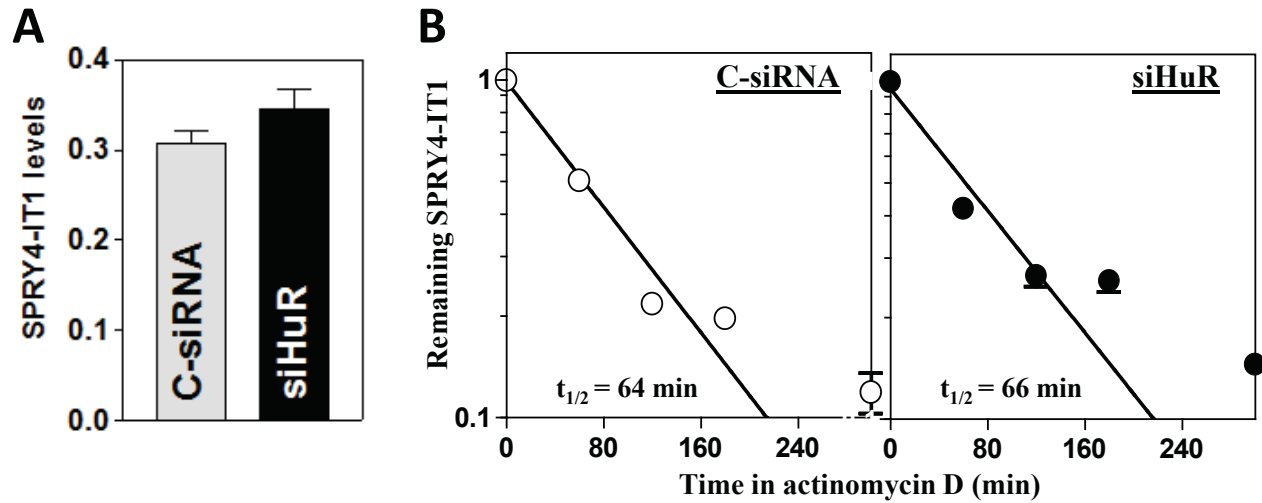

**Supplementary Figure 5. Effect of HuR silencing on SPRY4-IT1 content and its stability.** **A)** Levels of *SPRY4-IT1* 48 h after transfection with siHuR or C-siRNA. Values are means  $\pm$  SEM from three separate experiments. **B)** Stability of *SPRY4-IT1* in cells described in **A**. The levels of *SPRY4-IT1* were examined at different times after administration with actinomycin D.

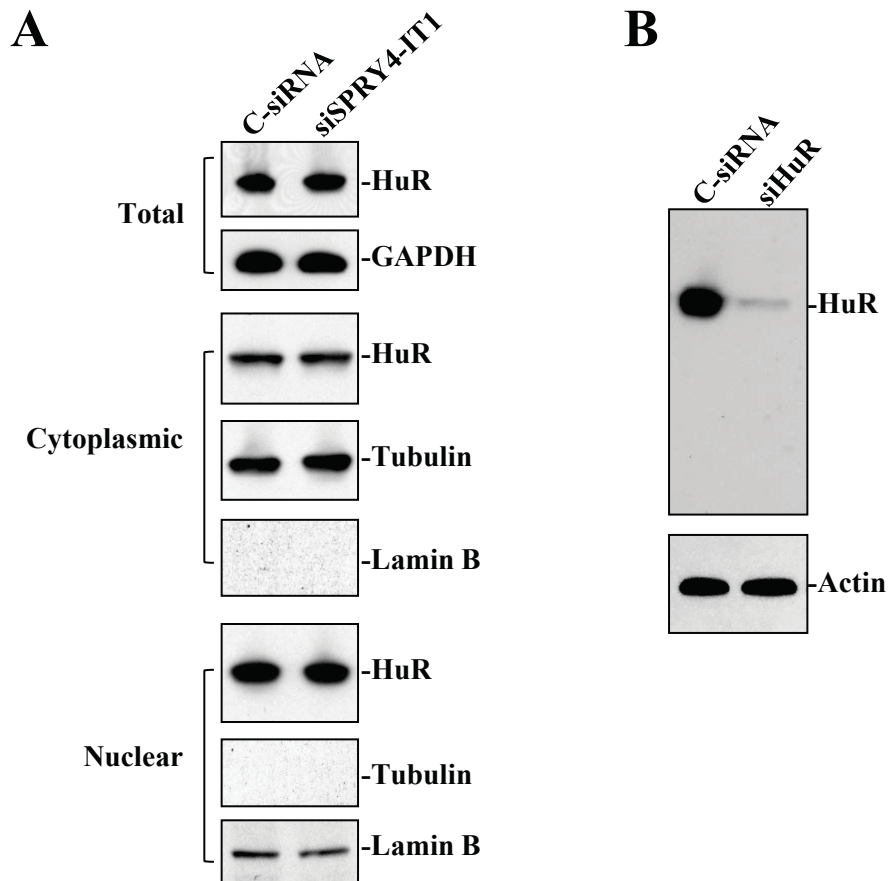

**Supplementary Figure 6. Effect of SPRY4-IT1 silencing on cellular HuR abundance and HuR levels after transfection with siHuR.** **A)** The levels of total, cytoplasmic, and nuclear HuR were examined 48 h after cells were transfected with siSPRY4-IT or C-siRNA. Three separate experiments showed similar results. **B)** HuR levels in cells transfected with siHuR or C-siRNA for 48 h.

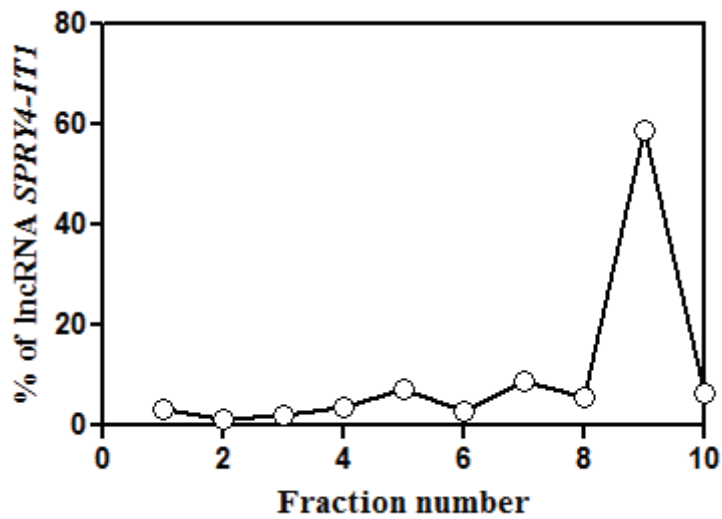

**Supplementary Figure 7. Distribution of *SPRY4-IT1* in each gradient fraction prepared from polysomes isolated from Caco-2 cells.** Total RNA was isolated from different fractions, and the levels of *SPRY4-IT1* were measured and plotted as a percentage of total *SPRY4-IT1* levels in each sample.



**Supplementary Table 1: Sequence alignments with highest score between *SPRY4-IT1* and TJ mRNAs**

| Score     | Expect | Identities  | Gaps     | Strand    |
|-----------|--------|-------------|----------|-----------|
| 21.1 bits | 1.0    | 11/11(100%) | 0/11(0%) | Plus/Plus |

SPRY4-IT1 24 TTGGTCAGGCT 34  
 CLDN1 722 TTGGTCAGGCT 732

| Score    | Expect | Identities  | Gaps      | Strand    |
|----------|--------|-------------|-----------|-----------|
| 107 bits | 2e-26  | 97/120(81%) | 3/120(2%) | Plus/Plus |

SPRY4-IT1 2 TAGAGATGGGGGTTTCATCCTGTTGGTCAGGCTGGTCTTGAACCTCCTGACCTCAAGTGAT 61  
 OCLN 3452 TAGAGACGGGGTTT-ACCATAGTGGCCAGGTGGTCTTGAACCTCCTGACCT--TGTGGT 3508  
 SPRY4-IT1 62 CTGCCTACCTTGGCCTCCCAAAGGCTGAGATTACAGGCATGAGCCACTGCGCCAGGCct 121  
 OCLN 3509 CTGCCTGCTCGGCCTCCCAAAGTGCTGGGATTACAGGCATGAGCCACCATGCTGCGCCT 3568

| Score     | Expect | Identities | Gaps     | Strand    |
|-----------|--------|------------|----------|-----------|
| 19.3 bits | 1.4    | 13/15(87%) | 0/15(0%) | Plus/Plus |

SPRY4-IT1 624 CTGAGCATTGCCCAT 638  
 CLDN3 290 CTGCGCGTTGCCCAT 304

| Score    | Expect | Identities  | Gaps      | Strand    |
|----------|--------|-------------|-----------|-----------|
| 107 bits | 1e-26  | 97/120(81%) | 3/120(2%) | Plus/Plus |

SPRY4-IT1 1 GTAGAGATGGGGGTTTCATCCTGTTGGTCAGGCTGGTCTTGAACCTCCTGACCTCAAGTGA 60  
 JAM-1 3439 GTAGAGACAGGG-TTTCACCATGTTGGTCGGGCTGGTCTCAAACCTCCTGACCTC--TTGA 3495  
 SPRY4-IT1 61 TCTGCCTACCTTGGCCTCCCAAAGGCTGAGATTACAGGCATGAGCCACTGCGCC 115  
 JAM-1 3496 TCCGCCTGCCTTGGCCTCCCAAAGTGATGGGATTACAGATGTGAGCCACCGTGCC 3550
